# Supplementary material for: Revealing mechanism of Caulis Sargentodoxae for the treatment of ulcerative colitis based on network pharmacology approach
Source: Oxford University Press journal article supplement (doi:10.1042/bsr20204005), 2021-01-01
Supplement: bsr-2020-4005_supp.pdf [file bsr-2020-4005_supp.pdf]

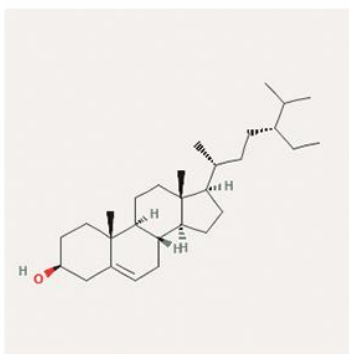

beta-sitosterol

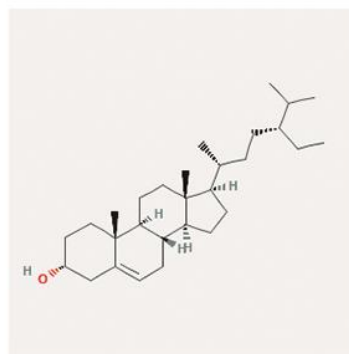

sitosterol

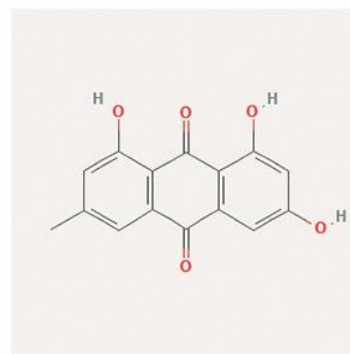

emodin

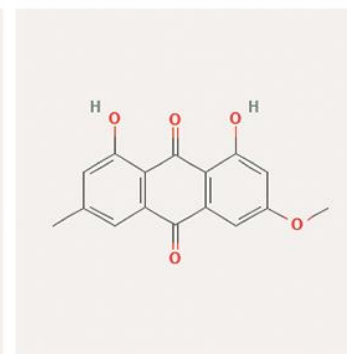

physcion

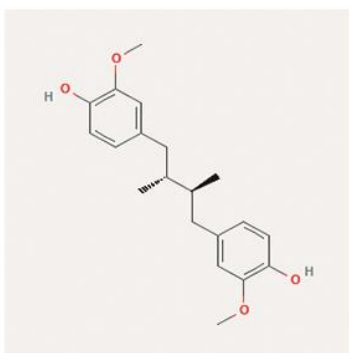

meso-dihydroguaiaretic  
acid

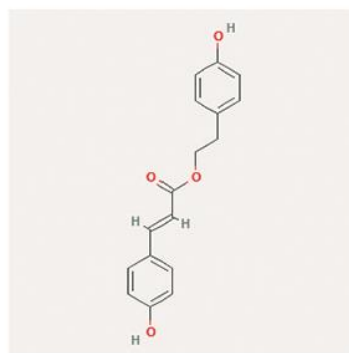

3-(4-Hydroxyphenyl)acrylic  
acid 4-hydroxyphenethyl ester

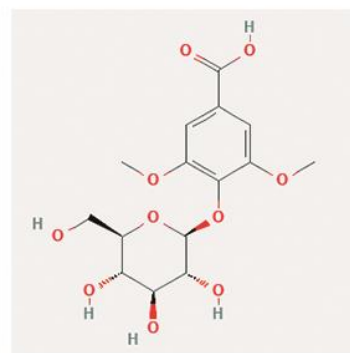

glucosyringic acid

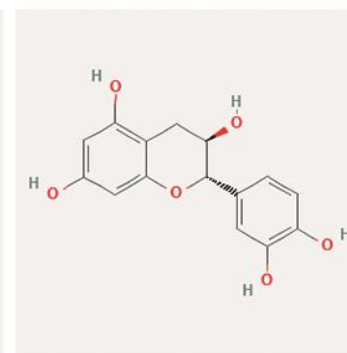

(-)-catechin

**Supplementary Figure 1.** Chemical structures of the components in *Caulis Sargentodoxae*.

# HIF-1 SIGNALING PATHWAY

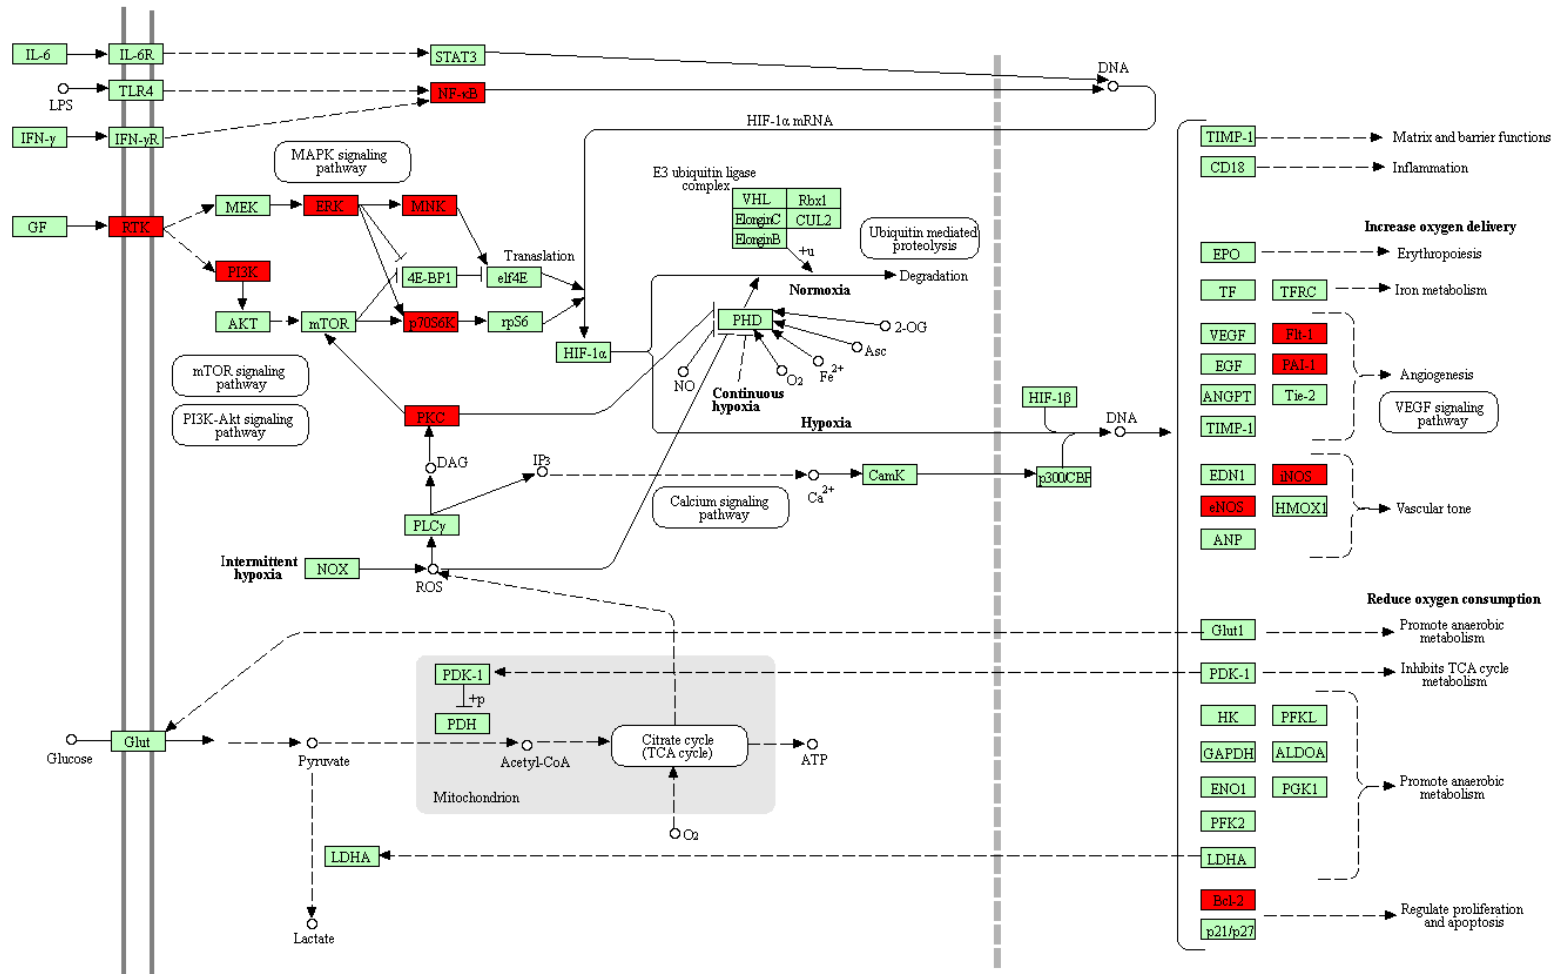

**Supplementary Figure 2.** HIF-1 signaling pathway(KEGG). Red nodes represent the targets regulated by *Caulis Sargentodoxae* in UC.

# PI3K-AKT SIGNALING PATHWAY

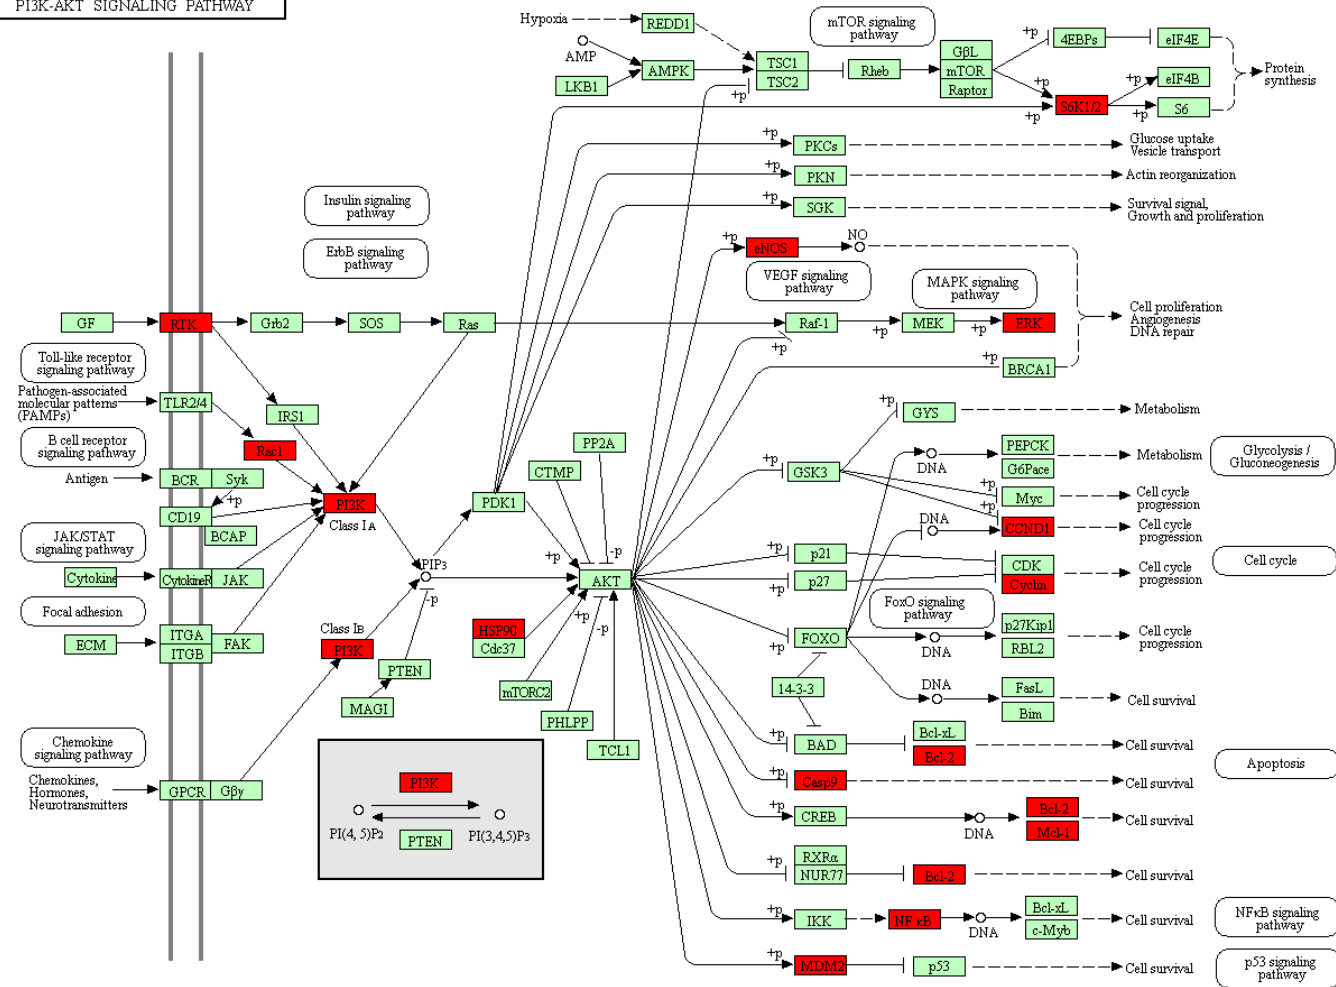

**Supplementary Figure 3.** PI3K-Akt signaling pathway(KEGG). Red nodes represent the targets regulated by *Caulis Sargentodoxae* in UC.

Supplementary Table 1. Toxicity prediction of 8 active components in *Caulis Sargentodoxae*

| Molecule Name                                                       | Carcinogenicity<br>(binary) | Carcinogenicity<br>(trinary) | Ames<br>mutagenesis | Hepatotoxicity | Acute Oral<br>Toxicity |
|---------------------------------------------------------------------|-----------------------------|------------------------------|---------------------|----------------|------------------------|
| beta-sitosterol                                                     | -                           | Non-required                 | -                   | -              | 3.059kg/mol            |
| sitosterol                                                          | -                           | Non-required                 | -                   | -              | 3.059kg/mol            |
| emodin                                                              | -                           | Non-required                 | -                   | +              | 2.564kg/mol            |
| physcion                                                            | -                           | Non-required                 | +                   | +              | 2.665kg/mol            |
| meso-dihydroguaiaretic<br>acid                                      | -                           | Non-required                 | -                   | -              | 1.969kg/mol            |
| 3-(4-<br>Hydroxyphenyl)acrylic<br>acid 4-<br>hydroxyphenethyl ester | -                           | Non-required                 | -                   | -              | 1.904kg/mol            |
| glucosyringic acid                                                  | -                           | Non-required                 | -                   | -              | 2.369kg/mol            |
| (-)-catechin                                                        | -                           | Non-required                 | +                   | -              | 1.972kg/mol            |
